# Supplementary material
Source: HighWire-hosted journal article supplement (http://molpharm.aspetjournals.org/highwire/filestream/77248/field_highwire_adjunct_files/0/S1-4_merged_91322.pdf)
Supplement: S1-4_merged_91322.pdf [file S1-4_merged_91322.pdf]

**The 19S deubiquitinase inhibitor b-AP15 is enriched in cells and elicits rapid commitment to cell death**

Xin Wang, William Stafford, Magdalena Mazurkiewicz, Mårten Fryknäs, Slavica Brjnic, Xiaonan Zhang, Joachim Gullbo, Rolf Larsson, Elias Arnér, Pdraig D'Arcy and Stig Linder

**Supplementary Figure 1. Uptake of b-AP15 into cells.**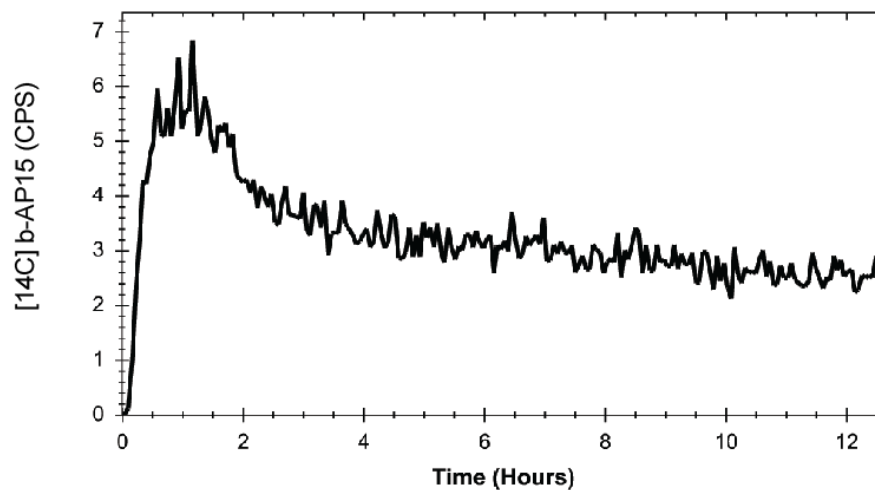

Uptake of [14C] b-AP15 over 12 hours was determined using LigandTracer® White. Association of radioactive drug with cells was determined in real-time.

**Supplementary Figure 2.** Structures of b-AP15 (NSC687852) and the analogues b-AP107 (NSC687449) and b-AP113 (NSC687853).

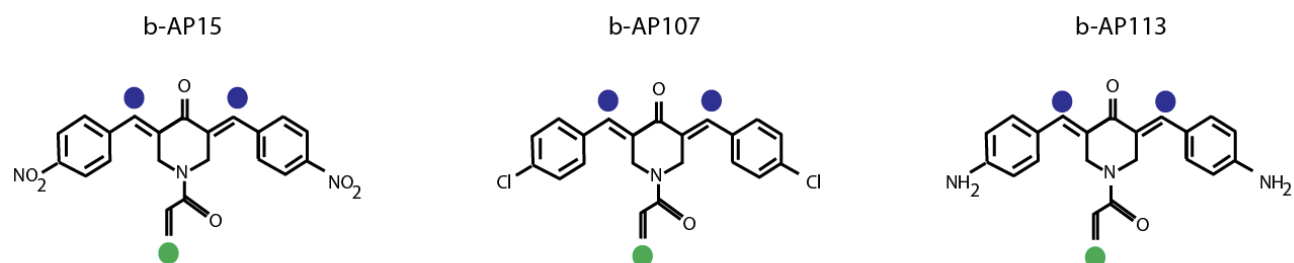

All compounds contain an  $\alpha, \beta$ -unsaturated carbonyl units (blue dots) and an acrylamide moiety with a potential Michael acceptor (green dot). Note that the cytotoxic activity of the compounds correlates with the reactivity of the  $\alpha, \beta$ -unsaturated carbonyl units (whereas compound b-AP113, which shows weak cytotoxic activity, contains the acrylamide).

**Supplementary Figure 3.** Response of MeJuSo Ub<sup>G76V</sup>-YFP cells to b-AP15 and b-AP113.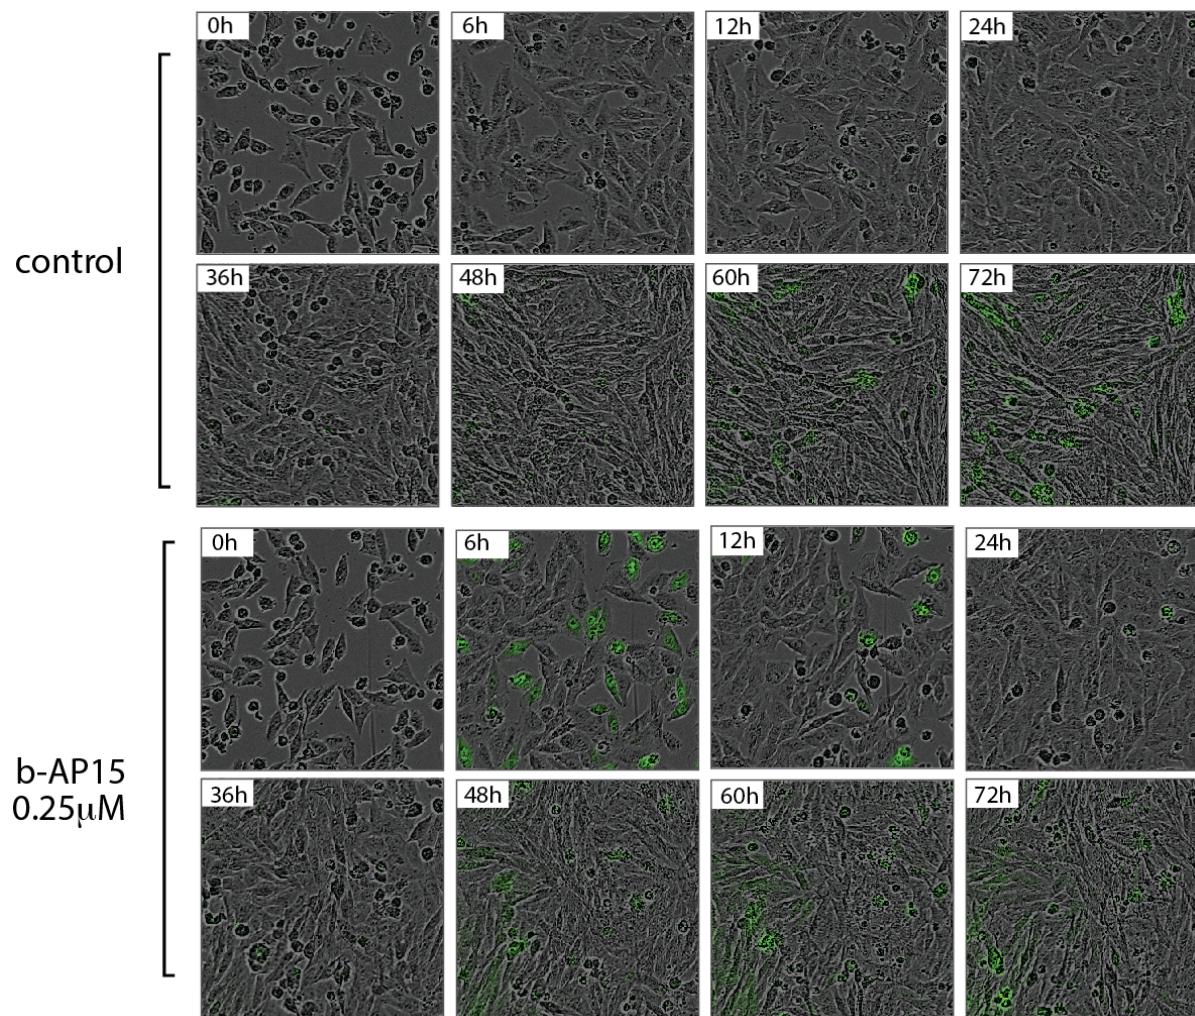

MeJuSo Ub<sup>G76V</sup>-YFP cells were monitored after exposure to the indicated compounds. Photographs were taken at the indicated time-points using an IncuCyte instrument.



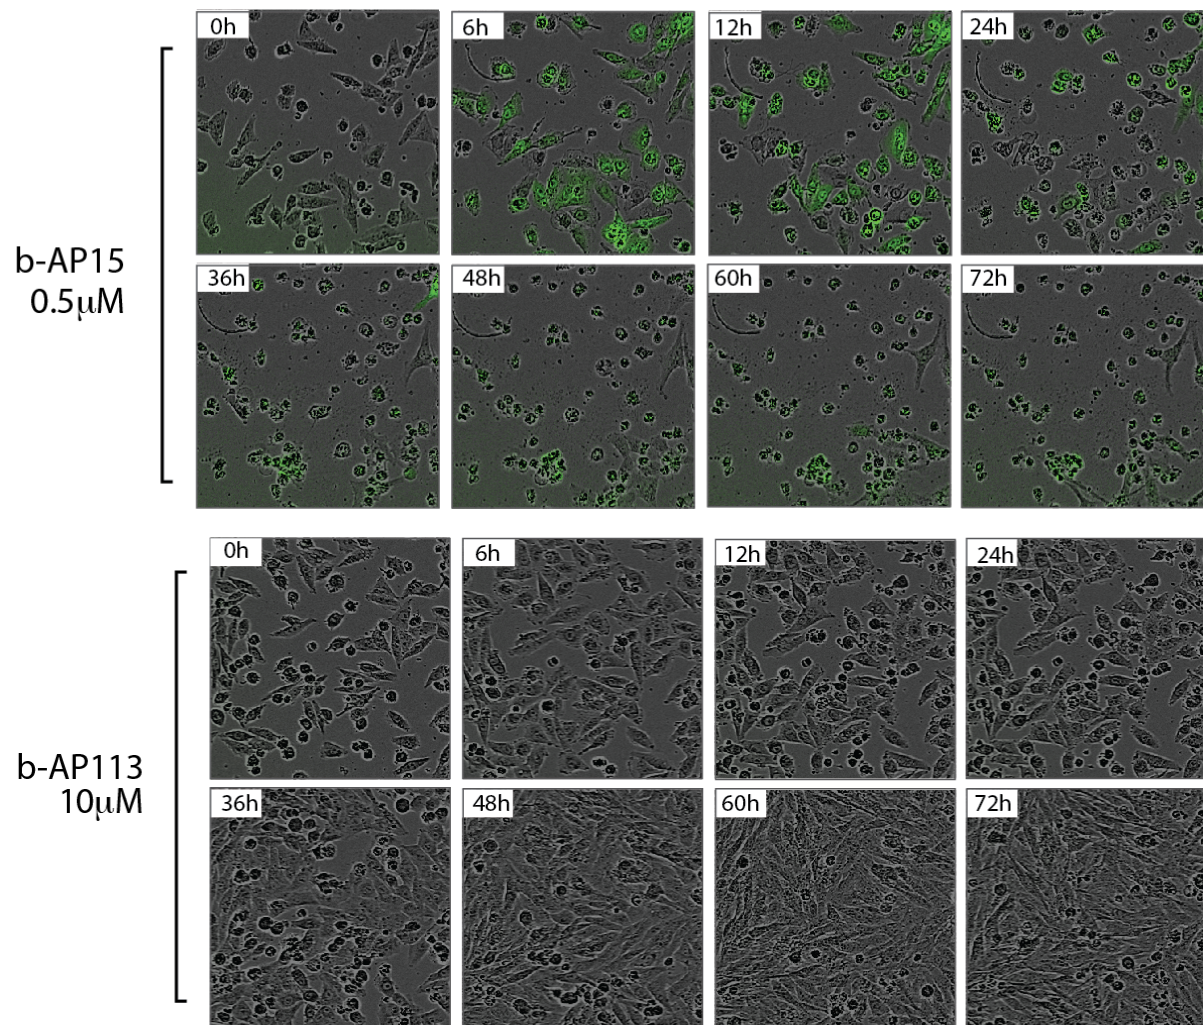

MelJuSo Ub<sup>G76V</sup>-YFP cells were monitored after exposure to the indicated compounds. Photographs were taken at the indicated time-points using an IncuCyte instrument.

**Supplementary Figure 4.** Analysis of oxidative stress induction by b-AP15 and the thioredoxin reductase inhibitor auranofin.

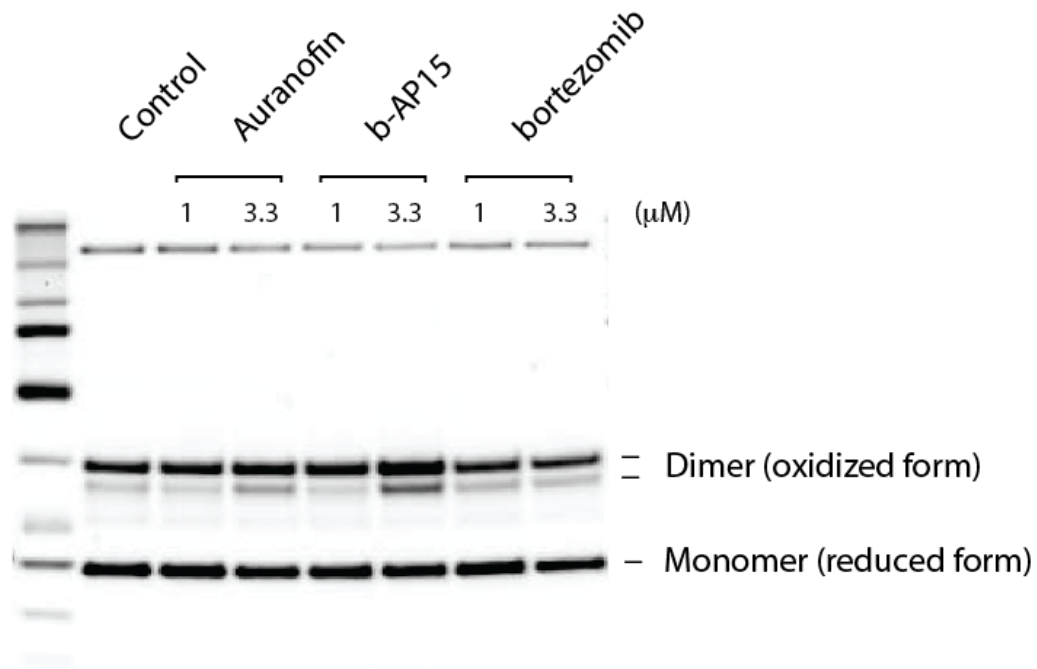

Analysis of monomeric and dimeric forms of periredoxin 3 (Prx-3) as an indicator of oxidative stress. HCT116 cells were exposed to the indicated compounds for 45 minutes. Lysates were prepared as described in Methods and electrophoresed under non-reducing conditions. Note the increase in the oxidized form of Prx-3 (localized to the mitochondrial matrix) after exposure to auranofin and b-AP15. Both bands labelled as oxidized forms disappear with treatment with DTT. For details on the methodology, see Poynton and Hampton, Periredoxins as biomarkers of oxidative stress, *Biochim Biophys Acta* 1840 (2014) 906.
